# Supplementary material for: Jack-of-all-trades effects drive biodiversity–ecosystem multifunctionality relationships in European forests
Source: PubMed Central journal article supplement (PMC4820852; doi:10.1038/ncomms11109), 2016-03-24
Supplement: ncomms11109-s1.pdf [file ncomms11109-s1.pdf]

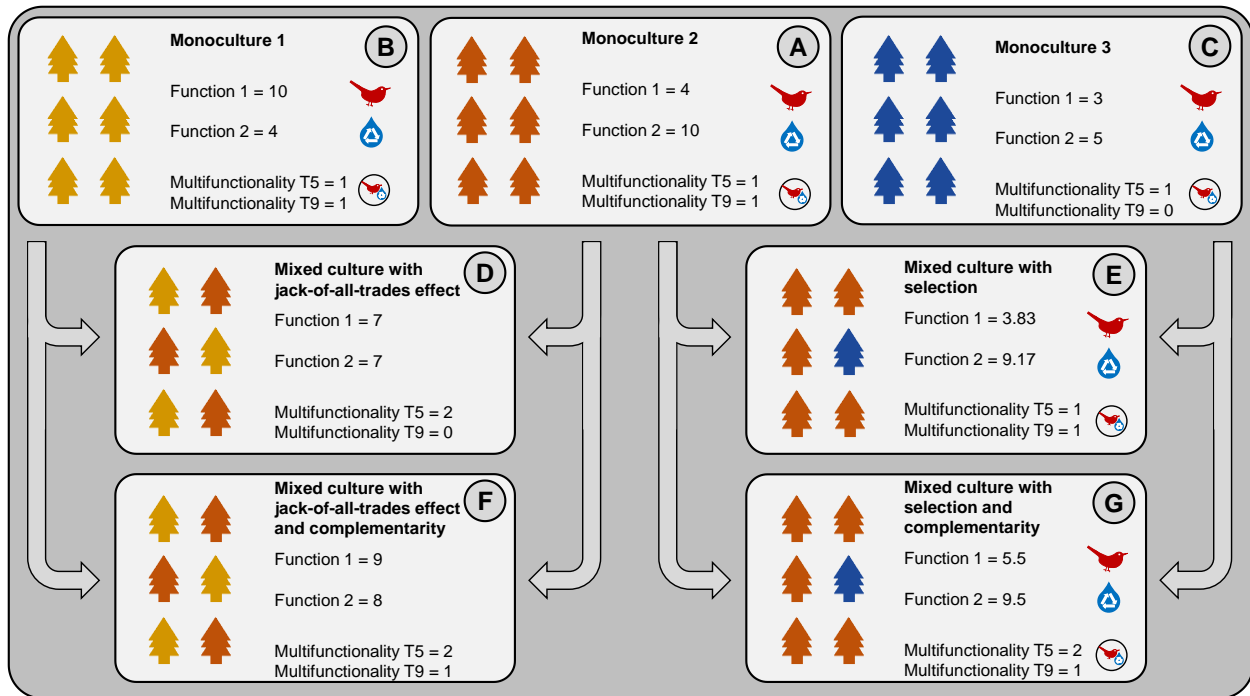

Supplementary Fig. 1. **Effects of selection, complementarity and jack-of-all-trades mechanisms can boost or decrease ecosystem functioning and multifunctionality in diverse communities.** A-C: Hypothetical monocultures with their values for two ecosystem functions and their values for multifunctionality based on a moderate threshold (T5) and a high threshold (T9). D,E: scenarios where function values in hypothetical mixtures of the monoculture species are derived additively from monoculture function values, leading to (D) a jack-of-all-trades effect or (E) a positive effect of selection. In D, function in the mixed culture can be derived from the weighted average of monoculture values:  $EF_{exp1,j} = \sum_{i=1}^S RYO_i \cdot F_{i,j}$  (eqn 1 main article) =  $EF_{exp2,j} = \sum_{i=1}^S RYE_i \cdot F_{i,j}$  (eqn 2 main article file;  $EF_{exp1,j}$  and  $EF_{exp2,j}$  are the same here because both species are equally abundant) =  $0.5 \cdot 10 + 0.5 \cdot 4 = 7$  (function 1) and  $0.5 \cdot 4 + 0.5 \cdot 10 = 7$  (function 2). Due to this additivity and the lack of abundance differences between component species, effects of selection and complementarity on individual functions and multifunctionality are 0. However, multifunctionality values in this mixture are either higher (for the moderate threshold level of 5) or lower (for the high threshold level of 9) than in the monocultures of component species, causing a positive jack-of-all-trades effect at a moderate threshold value, and a negative jack-of-all-trades effect at a high threshold value. In E,  $EF_{exp1,j}$  ( $= \sum_{i=1}^S RYO_i \cdot F_{i,j} = 3.83$  (function 1) or  $9.17$  (function 2)) is higher than  $EF_{exp1,j}$  ( $= \sum_{i=1}^S RYE_i \cdot F_{i,j} = 3.5$  (function 1) or  $7.5$  (function 2)) because the species with highest

monoculture values dominates. As a result, there are positive selection effects:  $ES_j = EF_{exp1,j} - EF_{exp2,j}$  (eqn 5 main article file) = 0.33 (function 1) or 1.67 (function 2). F,G: scenarios where function values in hypothetical mixtures of the monoculture species are derived non-additively from monoculture function values. As a result, a combination of complementarity and jack-of-all-trades mechanisms (F) or complementarity and selection (G) alter functioning in diverse communities. In both examples, function levels are higher than expected based on additive effects (D,E). As a result, there are positive effects of complementarity:  $EC_j = EF_{obs,j} - EF_{exp1,j}$  (eqn 4 main article file) = 2 and 1 (function 1 and 2 in F) or 0.67 and 0.33 (function 1 and 2 in G).

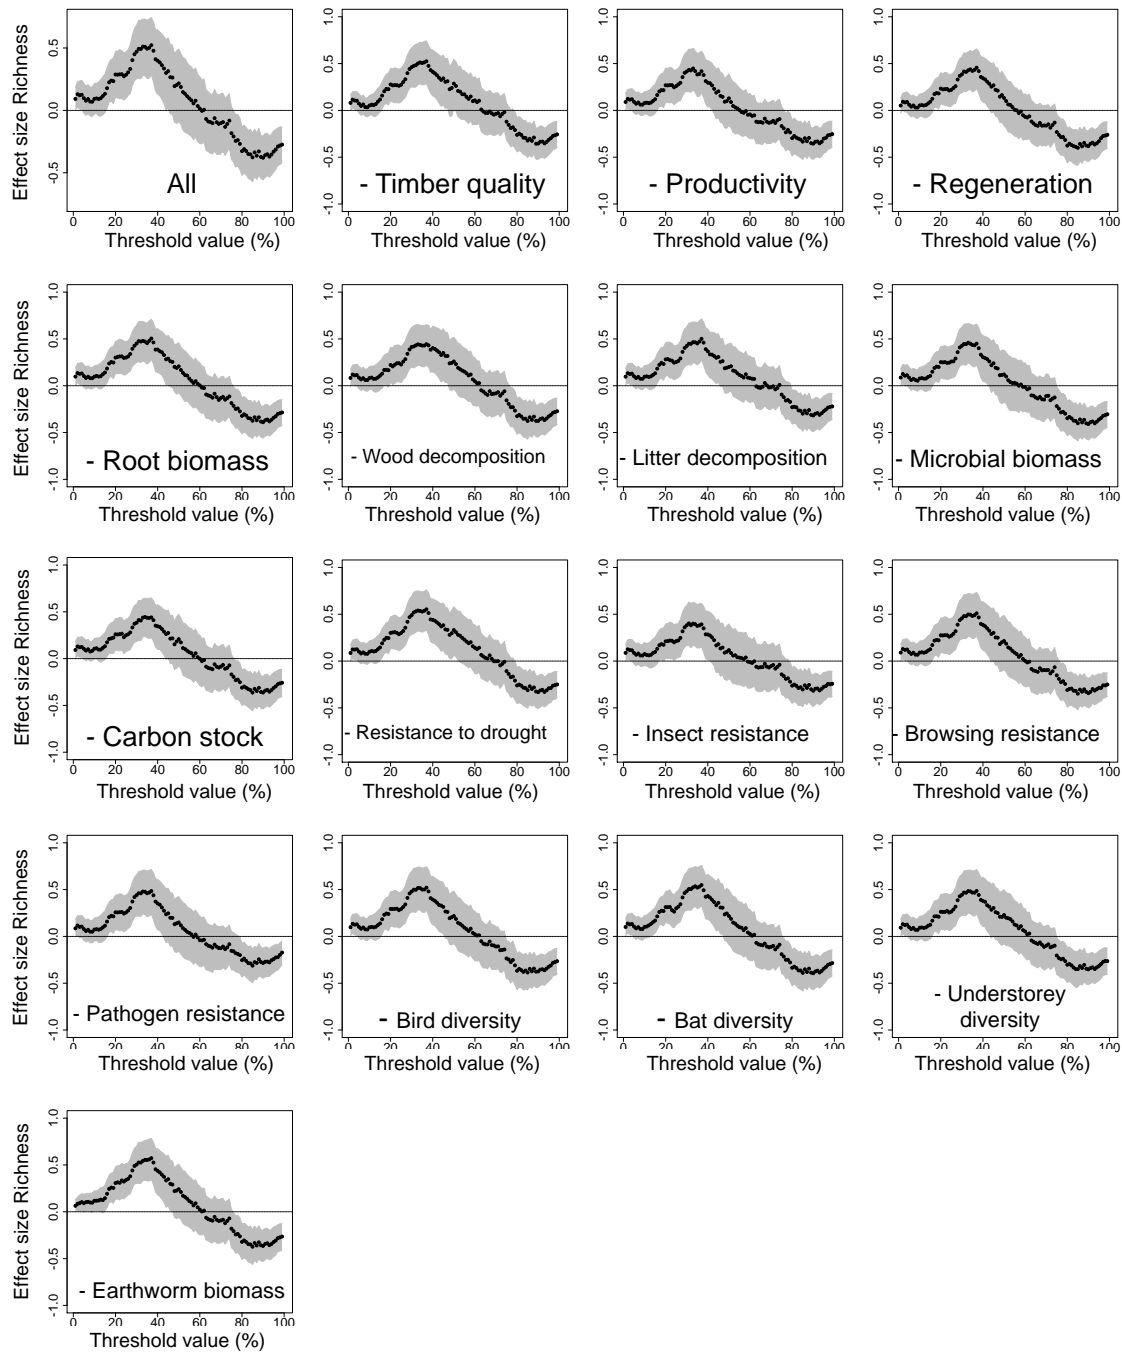

Supplementary Fig. 2. **Diversity-multifunctionality relationships are insensitive to the functions included.** Effect size (increase in number of functions > threshold per added species) by which species richness affects multifunctionality, both for overall multifunctionality and multifunctionality based on all but one discarded ecosystem function. Based on Linear Mixed Models (N = 209 plots). The grey polygons represent the 95% confidence intervals.

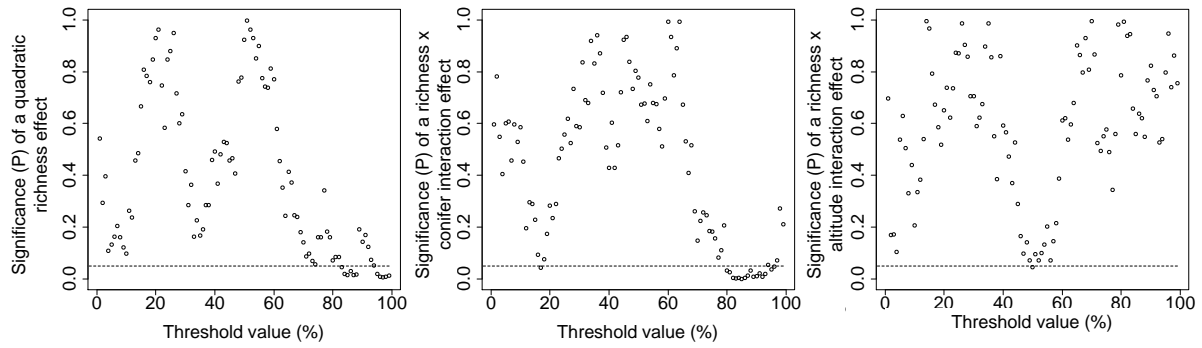

Supplementary Fig. 3. **The significance ( $P$  value) of a quadratic richness effect (left graph) a richness-conifer interaction effect (middle graph) and a richness-altitude interaction effect (right graph) on overall multifunctionality.** The quadratic richness effect was significant for 11 out of 99 tests, while the richness-conifer and the richness-altitude interaction effects were significant in 17 and 1 tests respectively. The horizontal, dotted line marks a significance level ( $P$ ) of 0.05. Based on Linear Mixed Models ( $N = 209$  plots).

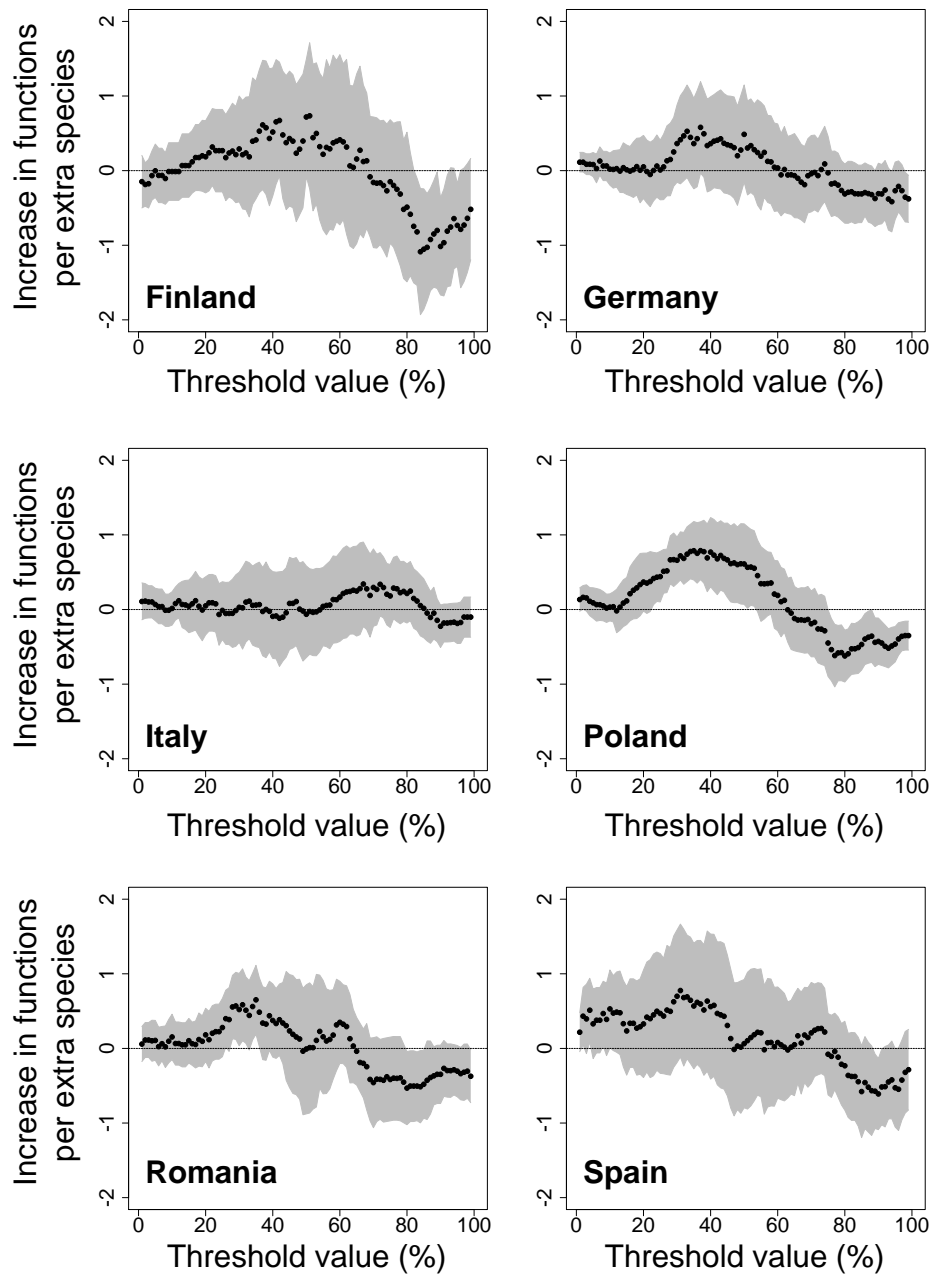

Supplementary Fig. 4. **The effect of tree biodiversity on ecosystem multifunctionality in different countries.** The biodiversity effect (change in total number of ecosystem functions per added species) is plotted as a function of the multifunctionality performance threshold value. The dotted, horizontal line represents a biodiversity effect of zero. Points above the horizontal line show positive effects of biodiversity, points below the line show negative effects. Based on Linear Mixed Models (N = 28, 38, 36, 43, 28 and 36 in respectively Finland, Germany, Italy, Poland, Romania and Spain).

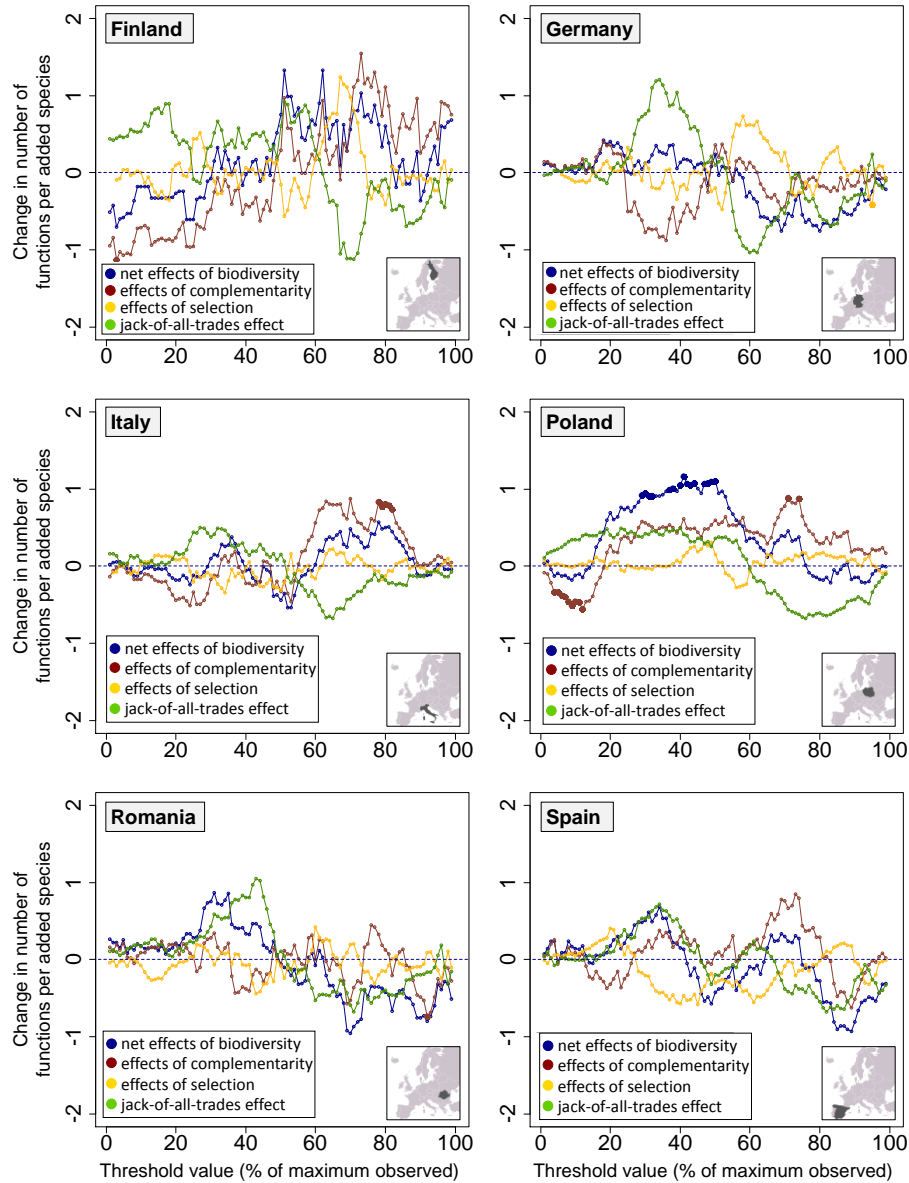

Supplementary Fig. 5. **The partitioned effects of forest biodiversity on ecosystem multifunctionality in different countries.** The biodiversity effects (change in total number of ecosystem functions per added species due to net, complementarity, selection or jack-of-all-trades effects) is plotted as a function of the multifunctionality performance threshold value. The dotted, horizontal line represents a biodiversity effect of zero. Points above the horizontal line show positive effects of biodiversity, points below the line show negative effects. Based on Linear Mixed Models (N = 28, 38, 36, 43, 28 and 36 in respectively Finland, Germany, Italy, Poland, Romania and Spain).

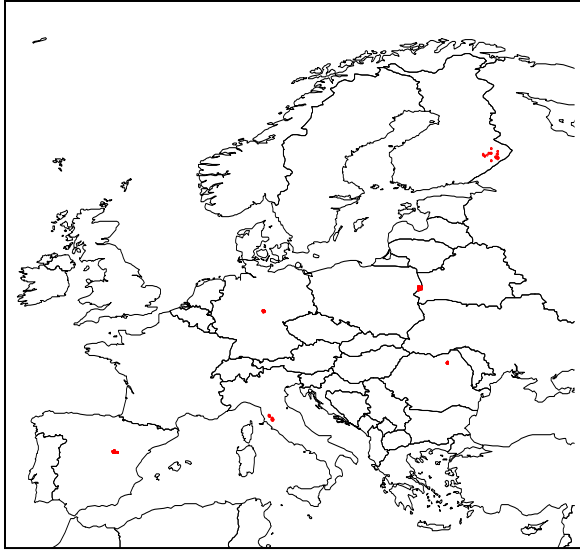

Supplementary Fig. 6. **Map of Europe with the locations of all plots.**

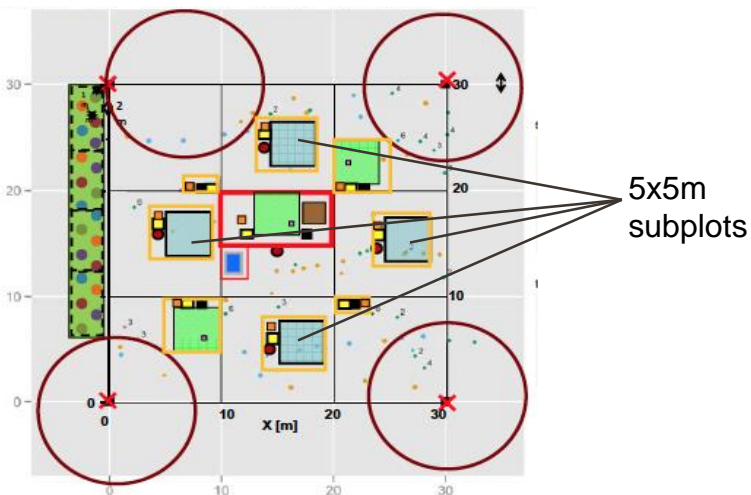

Supplementary Fig. 7. **Location of subplots where resistance to browsing was assessed.**

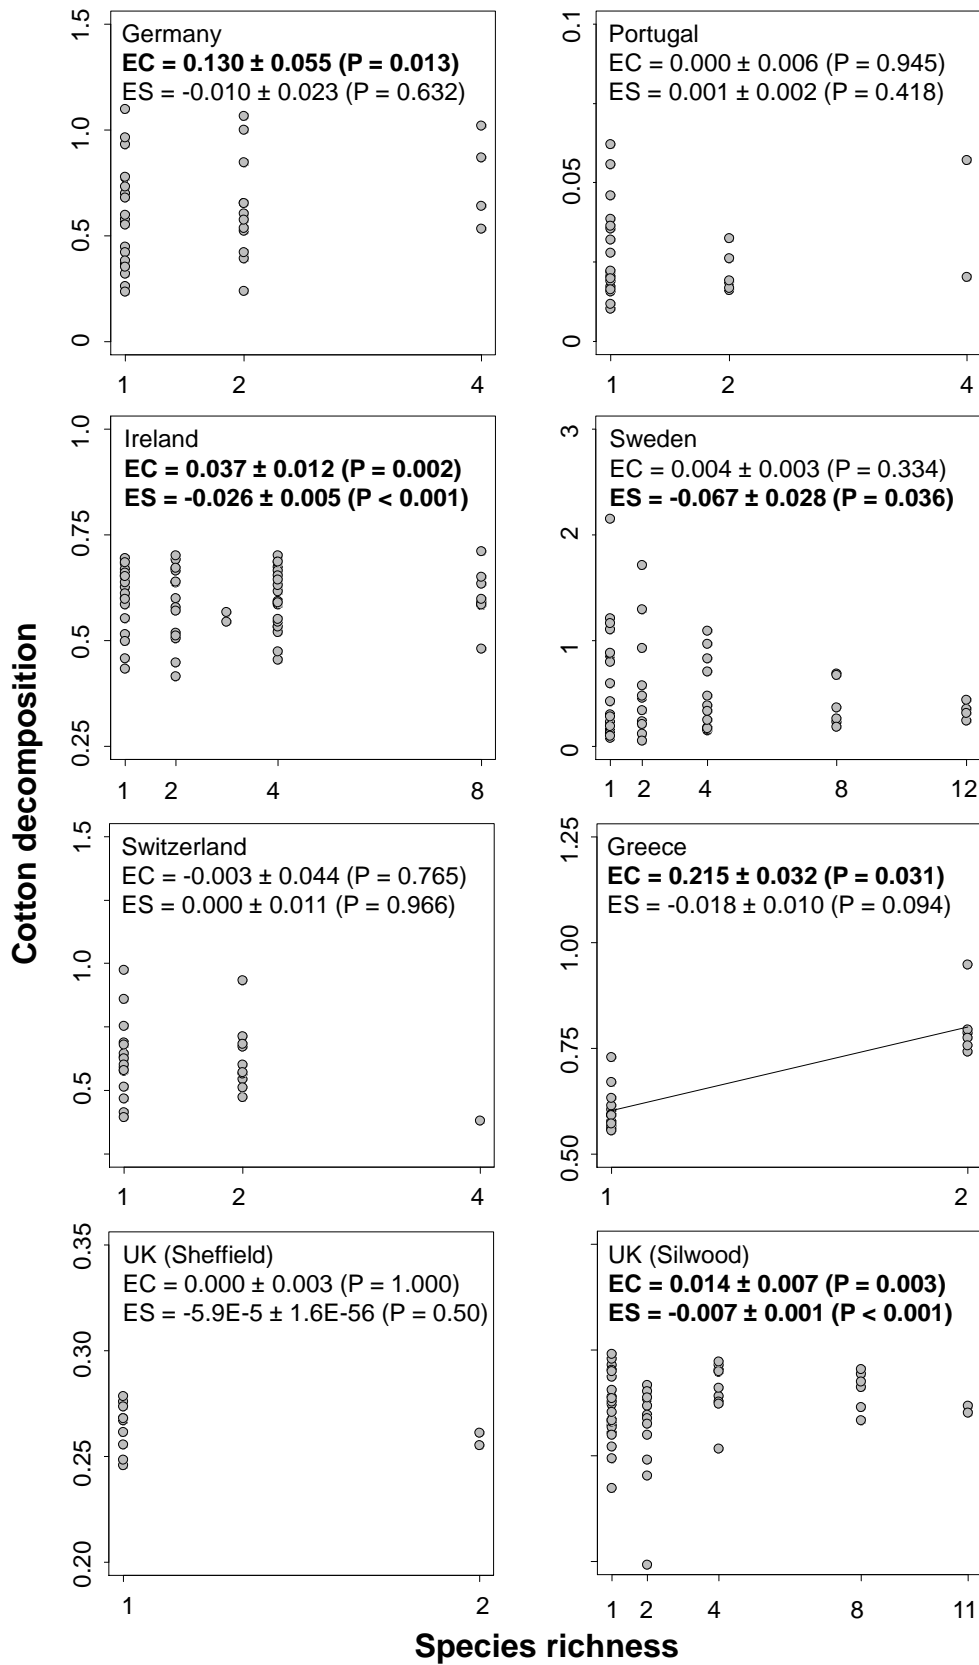



Supplementary Figure 8. **Biodiversity effects on cotton decomposition in 8 experiments are partitioning into complementarity and selection effects.** Observed relationships between biodiversity and cotton decomposition in 8 biodiversity experiments, as well as the average ( $\pm$  SEM) effects of complementarity (EC) and selection (ES) in mixed cultures, and their associated *P*-value, based on a Wilcoxon Signed Rank test. Decomposition data were acquired from Spehn *et al.* (1) and compositional data were acquired from Hector *et al.* (2). Only a subset of the plots (N = 297 in total: 36 in Germany, 26 in Portugal, 27 in Switzerland, 20 in Greece, 66 in Ireland, 58 in Sweden, 12 in Sheffield and 52 in Silwood), with (i) those monocultures of which all constituent species were also present in a monoculture and (ii) with non-missing decomposition or biomass data, was included. Our novel partitioning approach was used to estimate effects of complementarity and selection. A significant positive effect of diversity on decomposition was found in Greece, while positive trends were found in Germany, Ireland and Silwood and negative trends in Sweden. Significantly positive effects of complementarity in polycultures were found in Germany, Greece, Ireland and in Silwood, explaining the observed positive relationships / trends. Significantly (although weak) negative effects of selection in polycultures were found in Ireland, Sweden and Silwood.

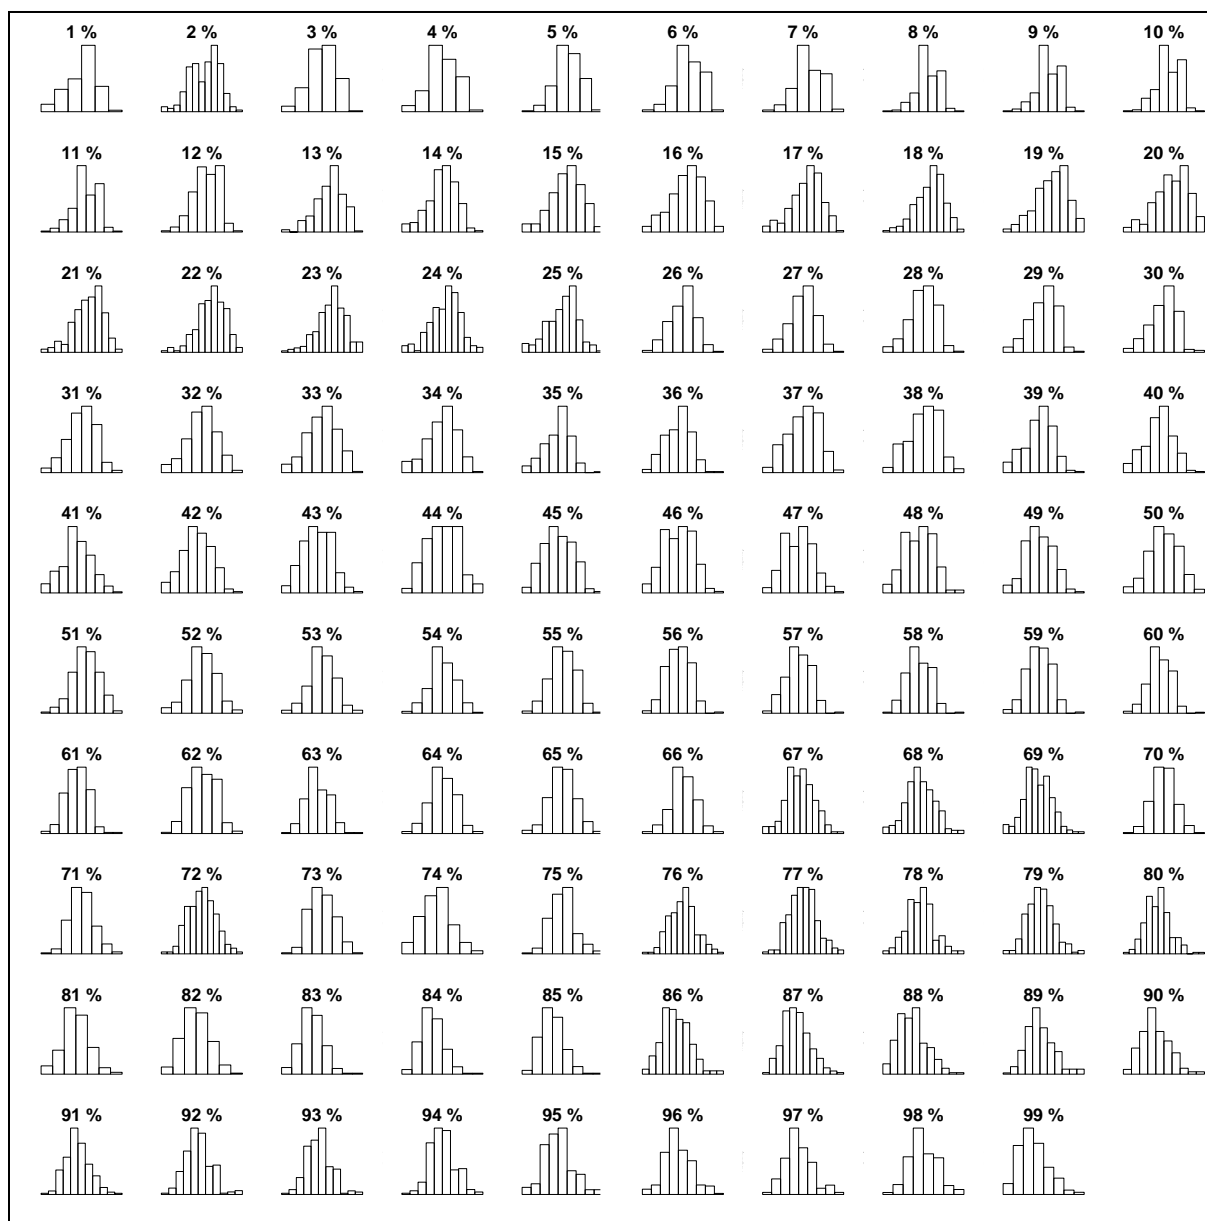

Supplementary Fig. 9. **Histograms of residual distributions of LMMs (N = 209) explaining overall multifunctionality, with different thresholds.**

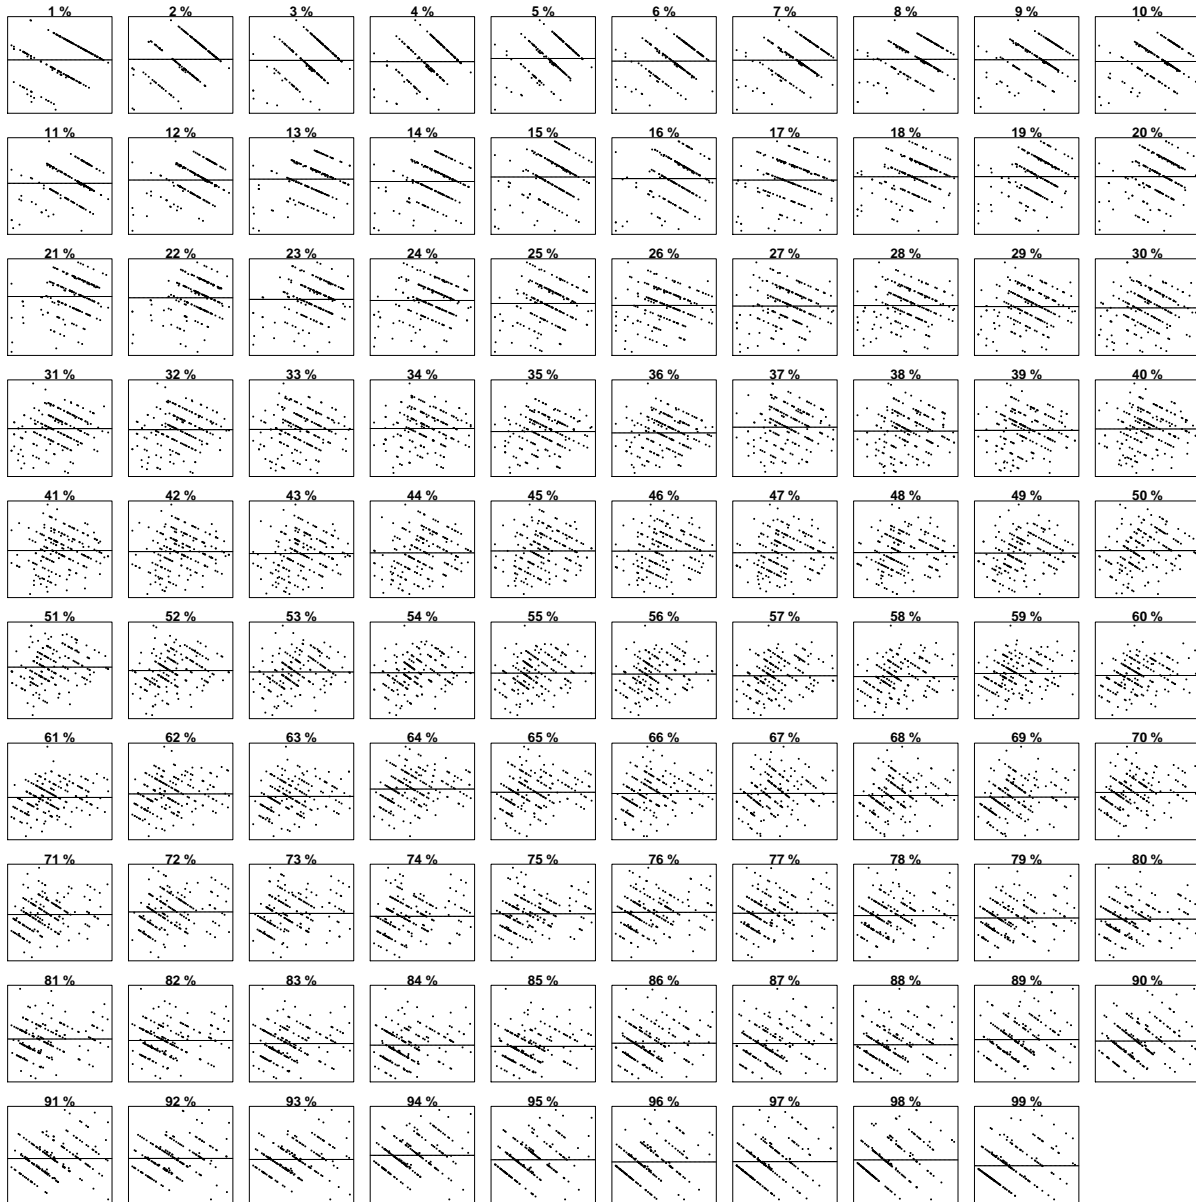

Supplementary Fig. 10. **Graphs showing the relationship between residual values of overall multifunctionality LMMs (N = 209) vs. fitted values, for all different threshold levels.**

Supplementary Table 1: **Summary statistics of the multiple threshold approach results.**

| Scenario                                   | Location | Positive biodiversity effects |                  |                  |                  |                  | Negative biodiversity effects |                  |                  |                  |                  |
|--------------------------------------------|----------|-------------------------------|------------------|------------------|------------------|------------------|-------------------------------|------------------|------------------|------------------|------------------|
|                                            |          | T <sub>min</sub>              | T <sub>max</sub> | T <sub>mde</sub> | R <sub>mde</sub> | P <sub>mde</sub> | T <sub>min</sub>              | T <sub>max</sub> | T <sub>mde</sub> | R <sub>mde</sub> | P <sub>mde</sub> |
| Overall multifunctionality                 | Europe   | 1%                            | 45%              | 37%              | 0.52             | 13.0%            | 76%                           | 99%              | 90%              | -0.38            | -9.5%            |
|                                            | Finland  |                               |                  | 51%              | 0.69             | 8.6%             | 82%                           | 97%              | 90%              | -1.07            | -13.3%           |
|                                            | Germany  | 33%                           | 38%              | 37%              | 0.80             | 15.0%            | 89%                           | 99%              | 94%              | -0.43            | -8.1%            |
|                                            | Italy    |                               |                  | 67%              | 0.47             | 11.8%            |                               |                  | 90%              | -0.24            | -5.9%            |
|                                            | Poland   | 2%                            | 48%              | 37%              | 0.77             | 19.2%            | 76%                           | 99%              | 80%              | -0.70            | -17.4%           |
|                                            | Romania  | 26%                           | 39%              | 35%              | 0.65             | 12.3%            | 99%                           | 99%              | 82%              | -0.46            | -8.7%            |
|                                            | Spain    | 2%                            | 10%              | 31%              | 0.78             | 14.6%            | 89%                           | 95%              | 90%              | -0.61            | -11.5%           |
| Multifunctional effects of complementarity | Europe   | 61%                           | 99%              | 74%              | 0.43             | 13.3%            | 5%                            | 28%              | 26%              | -0.29            | -9.0%            |
|                                            | Finland  |                               |                  | 73%              | 1.55             | 35.7%            | 3%                            | 3%               | 3%               | -1.13            | -26.1%           |
|                                            | Germany  |                               |                  | 18%              | 0.39             | 9.06%            |                               |                  | 36%              | -0.88            | -20.2%           |
|                                            | Italy    | 78%                           | 82%              | 70%              | 0.87             | 20.1%            | 20%                           | 24%              | 24%              | -0.51            | -11.7%           |
|                                            | Poland   | 71%                           | 74%              | 71%              | 0.88             | 20.4%            | 4%                            | 12%              | 12%              | -0.56            | -12.8%           |
|                                            | Romania  |                               |                  | 76%              | 0.44             | 10.2%            | 92%                           | 92%              | 92%              | -0.73            | -17.0%           |
|                                            | Spain    |                               |                  | 73%              | 0.85             | 19.5%            |                               |                  | 89%              | -0.63            | -14.5%           |
| Multifunctional effects of selection       | Europe   | 70%                           | 86%              | 65%              | 0.14             | 4.4%             | 32%                           | 33%              | 33%              | -0.16            | -4.9%            |
|                                            | Finland  |                               |                  | 67%              | 1.24             | 28.6%            |                               |                  | 51%              | -0.56            | -12.9%           |
|                                            | Germany  |                               |                  | 58%              | 0.73             | 16.9%            | 95%                           | 95%              | 52%              | -0.47            | -10.9%           |
|                                            | Italy    |                               |                  | 65%              | 0.22             | 5.0%             |                               |                  | 34%              | -0.34            | -7.9%            |
|                                            | Poland   |                               |                  | 47%              | 0.31             | 7.05%            |                               |                  | 56%              | -0.28            | -6.4%            |
|                                            | Romania  |                               |                  | 60%              | 0.42             | 9.7%             |                               |                  | 43%              | -0.44            | -10.2%           |
|                                            | Spain    |                               |                  | 20%              | 0.41             | 9.3%             |                               |                  | 45%              | -0.58            | -13.4%           |
| Multifunctional jack-of-all-trades effects | Europe   | 1%                            | 51%              | 33%              | 0.68             | 20.9%            | 61%                           | 99%              | 82%              | -0.73            | -22.4%           |
|                                            | Finland  |                               |                  | 51%              | 0.92             | 31.2%            |                               |                  | 71%              | -1.11            | -25.7%           |
|                                            | Germany  |                               |                  | 34%              | 1.21             | 27.8%            |                               |                  | 60%              | -1.04            | -23.9%           |
|                                            | Italy    |                               |                  | 27%              | 0.50             | 11.5%            |                               |                  | 65%              | -0.67            | -15.5%           |
|                                            | Poland   |                               |                  | 23%              | 0.49             | 11.3%            |                               |                  | 76%              | -0.68            | -15.7%           |
|                                            | Romania  |                               |                  | 43%              | 1.05             | 24.2%            |                               |                  | 71%              | -0.68            | -15.6%           |
|                                            | Spain    |                               |                  | 34%              | 0.71             | 16.5%            |                               |                  | 82%              | -0.68            | -15.6%           |

Values for indices generated by multiple threshold approach (3), with indices partitioned into effects of multifunctional complementarity, selection and jack-of-all-trades mechanisms.

Analyses were conducted using both the complete dataset (all countries combined) and for countries separately. T<sub>min</sub> / T<sub>max</sub>: minimum / maximum threshold values where a significant positive or negative effect of biodiversity was found. T<sub>mde</sub>: threshold of maximum (either positive or negative) biodiversity effect. R<sub>mde</sub>: the strength of the biodiversity effect (change in number of ecosystem functions > threshold per added species). P<sub>mde</sub>: Percentage of maximum possible diversity effect, i.e. R<sub>mde</sub> divided by the maximum richness minus the minimum richness (3).

Supplementary Table 2. **Summary statistics of sensitivity analyses, where diversity-multifunctionality relationships were calculated for 15 (instead of 16) functions only.**

| Missing function            | Positive biodiversity effects |                  |                  |                  |                  | Negative biodiversity effects |                  |                  |                  |                  |
|-----------------------------|-------------------------------|------------------|------------------|------------------|------------------|-------------------------------|------------------|------------------|------------------|------------------|
|                             | T <sub>min</sub>              | T <sub>max</sub> | T <sub>mde</sub> | R <sub>mde</sub> | P <sub>mde</sub> | T <sub>min</sub>              | T <sub>max</sub> | T <sub>mde</sub> | R <sub>mde</sub> | P <sub>mde</sub> |
| none                        | 1%                            | 45%              | 37%              | 0.52             | 13.0%            | 76%                           | 99%              | 90%              | -0.38            | -9.5%            |
| Timber quality              | 2%                            | 50%              | 37%              | 0.52             | 14.0%            | 79%                           | 99%              | 89%              | -0.36            | -9.5%            |
| Timber production           | 2%                            | 42%              | 33%              | 0.45             | 11.9%            | 77%                           | 99%              | 90%              | -0.36            | -9.5%            |
| Tree regeneration           | 2%                            | 43%              | 37%              | 0.46             | 12.2%            | 75%                           | 99%              | 85%              | -0.40            | -10.6%           |
| Root biomass                | 1%                            | 45%              | 37%              | 0.50             | 13.4%            | 76%                           | 99%              | 90%              | -0.39            | -10.4%           |
| Wood decomposition          | 2%                            | 47%              | 37%              | 0.44             | 11.8%            | 77%                           | 99%              | 90%              | -0.38            | -10.0%           |
| Litter decomposition        | 1%                            | 45%              | 37%              | 0.50             | 13.3%            | 80%                           | 99%              | 90%              | -0.32            | -8.5%            |
| Microbial biomass           | 2%                            | 42%              | 33%              | 0.46             | 12.2%            | 75%                           | 99%              | 90%              | -0.41            | -10.9%           |
| Soil carbon stock           | 1%                            | 45%              | 34%              | 0.44             | 11.8%            | 77%                           | 99%              | 85%              | -0.36            | -9.7%            |
| Resistance to drought       | 2%                            | 52%              | 37%              | 0.55             | 14.7%            | 79%                           | 99%              | 90%              | -0.33            | -8.9%            |
| Lack of insect herbivory    | 2%                            | 41%              | 31%              | 0.40             | 10.7%            | 79%                           | 99%              | 90%              | -0.32            | -8.5%            |
| Lack of mammal browsing     | 1%                            | 45%              | 37%              | 0.51             | 13.6%            | 77%                           | 99%              | 85%              | -0.35            | -9.3%            |
| Lack of pathogen damage     | 2%                            | 42%              | 37%              | 0.48             | 12.9%            | 79%                           | 99%              | 85%              | -0.31            | -8.3%            |
| Bird diversity              | 1%                            | 45%              | 37%              | 0.52             | 13.9%            | 75%                           | 99%              | 85%              | -0.38            | -10.3%           |
| Bat diversity               | 1%                            | 47%              | 37%              | 0.55             | 14.6%            | 76%                           | 99%              | 90%              | -0.39            | -10.5%           |
| Understorey plant diversity | 1%                            | 45%              | 37%              | 0.49             | 12.9%            | 75%                           | 99%              | 90%              | -0.35            | -9.4%            |
| Earthworm biomass           | 2%                            | 47%              | 37%              | 0.57             | 15.3%            | 76%                           | 99%              | 85%              | -0.37            | -10.0%           |

Values for indices generated by multiple threshold approach (3) applied to overall multifunctionality (missing function = none) and multifunctionality based on all but one missing ecosystem function. T<sub>min</sub> / T<sub>max</sub>: minimum / maximum threshold values were a significant positive or negative effect of biodiversity was found. T<sub>mde</sub>: threshold of maximum (either positive or negative) biodiversity effect. R<sub>mde</sub>: the strength of the biodiversity effect (change in number of ecosystem functions > threshold per added species). P<sub>mde</sub>: Percentage of maximum possible diversity effect, i.e. R<sub>mde</sub> divided by the maximum richness minus the minimum richness, see Byrnes et al. 2014 (3).

Supplementary Table 3: **Species-level correlation coefficients between Ecosystem Functions.**

|                                  | TQ           | TP           | TR           | RB           | WD           | LD           | MB           | CS          | RD          | IH           | B     | PD    | BD    | BaD         | PD   | EB   |
|----------------------------------|--------------|--------------|--------------|--------------|--------------|--------------|--------------|-------------|-------------|--------------|-------|-------|-------|-------------|------|------|
| Timber quality (TQ)              | 1.00         |              |              |              |              |              |              |             |             |              |       |       |       |             |      |      |
| Timber production (TP)           | 0.28         | 1.00         |              |              |              |              |              |             |             |              |       |       |       |             |      |      |
| Tree regeneration (TR)           | 0.27         | 0.25         | 1.00         |              |              |              |              |             |             |              |       |       |       |             |      |      |
| Root biomass (RB)                | <b>0.54</b>  | <b>0.42</b>  | 0.11         | 1.00         |              |              |              |             |             |              |       |       |       |             |      |      |
| Wood decomposition (WD)          | <b>-0.57</b> | -0.27        | -0.30        | -0.34        | 1.00         |              |              |             |             |              |       |       |       |             |      |      |
| Litter Decomposition (LD)        | 0.15         | -0.31        | <b>-0.49</b> | <b>0.45</b>  | -0.17        | 1.00         |              |             |             |              |       |       |       |             |      |      |
| Microbial biomass (MB)           | -0.13        | -0.01        | <b>0.53</b>  | -0.35        | 0.06         | <b>-0.41</b> | 1.00         |             |             |              |       |       |       |             |      |      |
| Soil carbon stock (CS)           | <b>0.53</b>  | -0.32        | 0.14         | -0.14        | -0.23        | 0.18         | 0.29         | 1.00        |             |              |       |       |       |             |      |      |
| Resistance to Drought (RD)       | <b>0.43</b>  | 0.35         | <b>0.54</b>  | <b>0.55</b>  | <b>-0.62</b> | 0.21         | 0.09         | 0.09        | 1.00        |              |       |       |       |             |      |      |
| Lack of insect herbivory (IH)    | 0.21         | <b>0.41</b>  | 0.36         | -0.33        | -0.11        | <b>-0.45</b> | 0.35         | 0.29        | 0.11        | 1.00         |       |       |       |             |      |      |
| Lack of mammal browsing (B)      | 0.11         | -0.17        | -0.15        | <b>-0.44</b> | -0.22        | 0.05         | -0.09        | <b>0.44</b> | -0.11       | <b>0.44</b>  | 1.00  |       |       |             |      |      |
| Lack of pathogen damage (PD)     | 0.04         | 0.16         | <b>0.57</b>  | 0.23         | -0.32        | -0.05        | <b>0.49</b>  | -0.07       | <b>0.50</b> | 0.01         | -0.28 | 1.00  |       |             |      |      |
| Bird diversity (BD)              | -0.17        | <b>-0.42</b> | 0.03         | -0.36        | <b>0.45</b>  | -0.10        | <b>0.43</b>  | <b>0.45</b> | -0.4        | -0.04        | -0.12 | -0.33 | 1.00  |             |      |      |
| Bat Diversity (BaD)              | -0.09        | -0.03        | <b>-0.48</b> | 0.19         | 0.03         | <b>0.52</b>  | -0.22        | 0.00        | 0.01        | -0.31        | 0.19  | 0.04  | -0.20 | 1.00        |      |      |
| Understorey plant diversity (PD) | 0.19         | 0.01         | -0.13        | 0.16         | -0.28        | <b>0.44</b>  | -0.17        | 0.13        | 0.23        | -0.03        | 0.21  | 0.05  | -0.14 | <b>0.67</b> | 1.00 |      |
| Eartworm biomass (EB)            | 0.05         | -0.02        | <b>-0.59</b> | 0.40         | 0.05         | <b>0.62</b>  | <b>-0.86</b> | -0.22       | 0.00        | <b>-0.41</b> | 0.08  | -0.35 | -0.29 | 0.39        | 0.27 | 1.00 |

Species-level correlation coefficients between Ecosystem Functions are based on average monoculture ecosystem function values, after correcting for country differences in functions. Correcting for country differences in functions was done by calculating residuals (average species function value – average country function value). Strong correlation coefficients between different variables (absolute coefficient value larger than 0.4) are shown in bold.

Supplementary Table 4. **Diversity-multifunctionality relationships in artificial communities.**

| $\bar{r}$ | $\varphi_x$ | Positive biodiversity effects |                  |                  |                  |                  | Negative biodiversity effects |                  |                  |                  |                  |
|-----------|-------------|-------------------------------|------------------|------------------|------------------|------------------|-------------------------------|------------------|------------------|------------------|------------------|
|           |             | T <sub>min</sub>              | T <sub>max</sub> | T <sub>mde</sub> | R <sub>mde</sub> | P <sub>mde</sub> | T <sub>min</sub>              | T <sub>max</sub> | T <sub>mde</sub> | R <sub>mde</sub> | P <sub>mde</sub> |
| -0.07     | 0.00        | 1%                            | 43%              | 29%              | 0.68             | 18.2%            | 56%                           | 99%              | 70%              | -0.67            | -18.0%           |
| 0.00      | 0.07        | 1%                            | 41%              | 30%              | 0.67             | 17.8%            | 58%                           | 99%              | 72%              | -0.67            | -17.8%           |
| 0.25      | 0.30        | 1%                            | 37%              | 28%              | 0.68             | 18.0%            | 63%                           | 99%              | 70%              | -0.68            | -18.1%           |
| 0.50      | 0.53        | 1%                            | 32%              | 30%              | 0.67             | 17.8%            | 67%                           | 99%              | 73%              | -0.67            | -17.9%           |
| 0.75      | 0.77        | 1%                            | 25%              | 29%              | 0.68             | 18.0%            | 73%                           | 99%              | 72%              | -0.67            | -17.9%           |
| 1.00      | 1.00        |                               |                  | 31%              | 0.76             | 20.2%            |                               |                  | 72%              | -0.76            | -20.3%           |

Supplementary Table 5: **Quality class overview**

| <b>Quality class</b> | <b>Conifers</b>                                                                                                                                                                                                    | <b>Broadleaved</b>                                                                                                                                                                                                                       | <b>Source</b>                                                           |
|----------------------|--------------------------------------------------------------------------------------------------------------------------------------------------------------------------------------------------------------------|------------------------------------------------------------------------------------------------------------------------------------------------------------------------------------------------------------------------------------------|-------------------------------------------------------------------------|
| <b>A = 4</b>         | one or more 5 m logs pruned or branch free; no curving; very few epicormics, very few to no pathologic defects; no waviness; no fissures/cracks                                                                    | A: minimum of 5 m log almost branch free, very small and few epicormics or branches; no curving; no pathologic defects; no waviness; no fissures/cracks                                                                                  | (European Commission <sup>(4-6)</sup> ; Mahler, Willmann & Wurster (7)) |
| <b>B = 3</b>         | one 5 m log almost branch free, no branches above 4 cm diameter above 5 m, few small epicormics; minor 1-sided curve acceptable, little taper; no mistletoe, minor pathologic defects; minor ovality; few branches | one or more 2 m logs largely branch free, no branches over 10 cm above 2 m, few small epicormics; 1-sided curve acceptable if otherwise acceptable; minor pathologic defects if wood damage is minimal; minor stem ovality; few branches |                                                                         |
| <b>C = 2</b>         | large branches along stem; curving, stem wounds, bumps, epicormics accepted                                                                                                                                        | large branches along stem; curving, stem wounds, bumps, epicormics accepted                                                                                                                                                              |                                                                         |
| <b>D = 1</b>         | Stems are utilizable but are likely to yield less than 40 % usable timber                                                                                                                                          | Stems are utilizable but are likely to yield less than 40 % usable timber                                                                                                                                                                |                                                                         |



Supplementary Table 6. Duration of the litter and wooden sticks incubation per region

| Region  | Incubation start | Incubation end | Duration (days) |
|---------|------------------|----------------|-----------------|
| Italy   | 06/06/2012       | 18/07/2013     | 407             |
| Finland | 20/06/2012       | 05/10/2013     | 471             |
| Romania | 16/07/2012       | 14/09/2013     | 362             |
| Spain   | 03/09/2012       | 01/05/2014     | 605             |
| Poland  | 18/09/2012       | 17/06/2013     | 269             |
| Germany | 08/10/2012       | 18/04/2013     | 190             |

Supplementary Table 7. Details on sampling effort and characteristics of pathogen damage per species.

| Tree species        | Country | Disease assessed               | Plots with species | Total number of target trees | Number of plots, trees and leaves containing target species |      |        |           |      |        |           |      |        |           |      |        |           |      |        |
|---------------------|---------|--------------------------------|--------------------|------------------------------|-------------------------------------------------------------|------|--------|-----------|------|--------|-----------|------|--------|-----------|------|--------|-----------|------|--------|
|                     |         |                                |                    |                              | 1 species                                                   |      |        | 2 species |      |        | 3 species |      |        | 4 species |      |        | 5 species |      |        |
|                     |         |                                |                    |                              | Plot                                                        | Tree | Leaves | Plot      | Tree | Leaves | Plot      | Tree | Leaves | Plot      | Tree | Leaves | Plot      | Tree | Leaves |
| Castanea sativa     | Italy   | Leaf spots                     | 17                 | 56                           | 2                                                           | 12   | 699    | 4         | 12   | 690    | 5         | 14   | 810    | 5         | 15   | 913    | 1         | 3    | 180    |
| Ostrya carpinifolia | Italy   | Leaf spots                     | 15                 | 50                           | 2                                                           | 12   | 660    | 3         | 8    | 450    | 4         | 12   | 721    | 5         | 15   | 945    | 1         | 3    | 180    |
| Quercus cerris      | Italy   | Leaf spots, Oak powdery mildew | 18                 | 59                           | 2                                                           | 12   | 720    | 4         | 12   | 686    | 5         | 14   | 820    | 6         | 18   | 1080   | 1         | 3    | 180    |
| Quercus ilex        | Italy   | Leaf spots, Oak powdery mildew | 20                 | 66                           | 2                                                           | 12   | 675    | 4         | 12   | 661    | 6         | 18   | 1051   | 7         | 21   | 1261   | 1         | 3    | 180    |
| Quercus petraea     | Italy   | Oak powdery mildew             | 17                 | 53                           | 2                                                           | 12   | 660    | 3         | 9    | 450    | 5         | 15   | 870    | 5         | 14   | 881    | 1         | 3    | 180    |
| Acer pseudoplatanus | Germany | Leaf spots                     | 20                 | 53                           | -                                                           | -    | -      | 4         | 11   | 550    | 10        | 28   | 1400   | 6         | 14   | 725    | -         | -    | -      |
| Fagus sylvatica     | Germany | Leaf spots                     | 29                 | 92                           | 2                                                           | 12   | 600    | 6         | 18   | 900    | 15        | 44   | 2200   | 6         | 18   | 900    | -         | -    | -      |
| Fraxinus excelsior  | Germany | Leaf spots                     | 23                 | 72                           | 1                                                           | 6    | 300    | 6         | 18   | 900    | 12        | 37   | 1823   | 4         | 11   | 555    | -         | -    | -      |
| Quercus sp          | Germany | Oak powdery mildew             | 16                 | 45                           | 1                                                           | 6    | 305    | 2         | 6    | 300    | 8         | 22   | 1118   | 5         | 11   | 550    | -         | -    | -      |
| Picea abies         | Germany | Rust, Needle cast              | 10                 | 34                           | 2                                                           | 12   | 240    | 3         | 8    | 160    | 3         | 8    | 160    | 2         | 6    | 120    | -         | -    | -      |
| Betula pendula      | Finland | Birch leaf spots               | 16                 | 60                           | 4                                                           | 24   | 1200   | 8         | 24   | 1200   | 4         | 12   | 575    | -         | -    | -      | -         | -    | -      |
| Picea abies         | Finland | Rust, Needle cast              | 16                 | 60                           | 4                                                           | 24   | 480    | 8         | 24   | 480    | 4         | 12   | 240    | -         | -    | -      | -         | -    | -      |
| Pinus sylvestris    | Finland | Rust, Needle cast              | 16                 | 60                           | 4                                                           | 24   | 480    | 8         | 24   | 480    | 4         | 12   | 240    | -         | -    | -      | -         | -    | -      |
| Quercus faginea     | Spain   | Leaf spots                     | 22                 | 75                           | 4                                                           | 21   | 1260   | 9         | 27   | 1620   | 6         | 18   | 1080   | 3         | 9    | 540    | -         | -    | -      |
| Quercus ilex        | Spain   | Leaf spots                     | 15                 | 51                           | 3                                                           | 15   | 900    | 6         | 18   | 1080   | 3         | 9    | 540    | 3         | 9    | 540    | -         | -    | -      |
| Pinus nigra         | Spain   | Rust, Needle cast              | 21                 | 72                           | 3                                                           | 18   | 359    | 9         | 27   | 539    | 6         | 18   | 360    | 3         | 9    | 179    | -         | -    | -      |
| Pinus sylvestris    | Spain   | Rust, Needle cast              | 15                 | 54                           | 3                                                           | 18   | 358    | 6         | 18   | 356    | 3         | 9    | 179    | 3         | 9    | 179    | -         | -    | -      |
| Acer pseudoplatanus | Romania | Leaf spots                     | 12                 | 42                           | 2                                                           | 12   | 671    | 3         | 9    | 540    | 4         | 12   | 676    | 3         | 9    | 506    | -         | -    | -      |
| Fagus sylvatica     | Romania | Leaf spots                     | 19                 | 63                           | 2                                                           | 12   | 720    | 7         | 21   | 1260   | 7         | 21   | 1260   | 3         | 9    | 540    | -         | -    | -      |
| Abies alba          | Romania | Rust, Needle cast              | 15                 | 51                           | 2                                                           | 12   | 240    | 5         | 15   | 300    | 5         | 15   | 300    | 3         | 9    | 178    | -         | -    | -      |
| Picea abies         | Romania | Rust, Needle cast              | 15                 | 51                           | 2                                                           | 12   | 240    | 5         | 15   | 295    | 5         | 15   | 300    | 3         | 9    | 171    | -         | -    | -      |
| Pinus sylvestris    | Poland  | Rust, Needle cast              | 23                 | 75                           | 2                                                           | 12   | 240    | 4         | 12   | 240    | 7         | 21   | 420    | 8         | 24   | 480    | 2         | 6    | 120    |
| Betula pendula      | Poland  | Leaf spots                     | 22                 | 72                           | 1                                                           | 6    | 360    | 5         | 18   | 1080   | 6         | 18   | 1080   | 8         | 24   | 1440   | 2         | 6    | 360    |
| Carpinus betulus    | Poland  | Leaf spots                     | 25                 | 81                           | 2                                                           | 12   | 720    | 6         | 18   | 1080   | 7         | 21   | 1260   | 8         | 24   | 1440   | 2         | 6    | 360    |
| Quercus robur       | Poland  | Oak powdery mildew             | 23                 | 75                           | 1                                                           | 6    | 360    | 3         | 12   | 720    | 9         | 27   | 1618   | 8         | 24   | 1440   | 2         | 6    | 360    |
| Picea abies         | Poland  | Rust, Needle cast              | 23                 | 75                           | 2                                                           | 12   | 220    | 5         | 15   | 300    | 6         | 18   | 360    | 8         | 24   | 480    | 2         | 6    | 120    |

## SUPPLEMENTARY REFERENCES

1. Spehn, E. M. *et al.*, *Ecol. Monogr.* **75**, 37-63 (2005).
2. Hector, A. *et al.*, *Ecology* **95**, 2213-2220 (2010).
3. Byrnes, J. E. K. *et al.*, *Methods Ecol. Evol.* **5**, 111-124 (2014).
4. European Commission. *EN 1316-1:1997: Hardwood Round Timber - Qualitative Classification - Part 1: Oak and Beech; German Version* (1997).
5. European Commission. *EN 1927-1:2008: Classification of Softwood Round Timber - Part 1: Spruces and Firs; German Version* (2008).
6. European Commission. *EN 1927-2:2008: Qualitative Classification of Softwood Round Timber - Part 2: Pines; German Version* (2008).
7. Mahler, G., Willmann, U. & Wurster, M. FVA - Forstliche Versuchs- und Forschungsanstalt Baden-Württemberg, [http://www.fva-bw.de/forschung/wn/bwi\\_gueteanspr/arbeitsanweisung.pdf](http://www.fva-bw.de/forschung/wn/bwi_gueteanspr/arbeitsanweisung.pdf) (2001).
